# Supplementary material for: A new resonance Rayleigh scattering method for trace Pb, coupling the hydride generation reaction with nanogold formation
Source: Royal Society of Chemistry journal article supplement (doi:10.1039/c3ra42030b), 2013-01-01
Supplement: c3ra42030b.pdf [file c3ra42030b.pdf]

# A new resonance Rayleigh scattering method for trace Pb coupling the hydride generation reaction with nanogold reaction

Aihui Liang\*, Yanyan Wei, Guiqing Wen, Wenqing Yin and Zhiliang Jiang\*

(Key Laboratory of Ecology of Rare and Endangered Species and Environmental Conservation of Education Ministry; Guangxi Key Laboratory of Environmental Pollution Control Theory and Technology; Guangxi Normal University, Guilin 541004, China)

## Experimental

### Apparatus and Reagents

A model of F-7000 Hitachi fluorescence spectrometer (Hitachi company, Japan), a model of F95S fluorescence spectrometer (Shanghai Jinmin Instrumental Co. Ltd., China), a model of JSM-6380LV scanning electron microscope (Japan), a model of SK8200LH ultrasonic reactor with operating frequency of 59 KHz (Shanghai Family Guide Ultrasonic Instrument Co. Ltd., China), and a model of TU- 1901 double beam UV -Vis spectrophotometer (Beijing Purkinje General Instrument Co. Ltd., China) were used.

Taken 1.00g  $\text{HAuCl}_4 \cdot 3\text{H}_2\text{O}$  (National Pharmaceutical Group Chemical Reagents Company, China) to dissolve in 100 mL water to obtain a 3.33%  $\text{Au}^{3+}$  solution, and it was diluted with water to obtain a 1.0 %  $\text{Au}^{3+}$  solution for use. A  $1.00 \times 10^{-2}$  mol/L  $\text{Pb}(\text{NO}_3)_2$  standard stock solution, 0.79 mol/L  $\text{NaBH}_4$  solution, 0.3 mol/L  $\text{K}_3[\text{Fe}(\text{CN})_6]$  solution,  $3.0 \times 10^{-2}$  mol/L  $\text{K}_2\text{Cr}_2\text{O}_7$ , 1.47 mol/L  $\text{H}_2\text{O}_2$ , 0.2 mg/L arabic gum, 0.12 mol/L  $\text{NH}_4\text{SCN}$ , 7.5 mol/L  $\text{H}_3\text{PO}_4$  were prepared. The absorption solution was mixed by 10 mL 7.5 mol/L  $\text{H}_3\text{PO}_4$ , 1.2 mL 1%  $\text{HAuCl}_4$ , 2 mL 0.12 mol/L  $\text{NH}_4\text{SCN}$  and 1 mL 0.2mg/mL arabic gum solution, and diluted to 100 mL with water. All reagents were of analytical grade and the water was doubly distilled.

### Procedure

A certain amount of  $\text{Pb}^{2+}$  standard solution was added into the reaction bottle and diluted with water to 10 mL, then 1.0 mL 0.3 mol/L  $\text{K}_3[\text{Fe}(\text{CN})_6]$  solution, 1.0 mL 0.03 mol/L  $\text{K}_2\text{Cr}_2\text{O}_7$  solution, 0.75 mL 1.47 mol/L  $\text{H}_2\text{O}_2$  solution and 1.0 ml 4 mol/L  $\text{HCl}$  solution were added into the reaction bottle in turn, and mixed well. A 7 mL of the absorption solution was added into the absorb tube, and connected the experimental apparatus as in Figure 1. Under the ultrasonic condition, a 10 mL 0.79 mol/L  $\text{NaBH}_4$  solution was added quickly by pear-shaped separatory funnel to produce  $\text{PbH}_4$  gas that absorb with the absorption solution. Finally, the absorption solution was transferred to a 1 cm quartz cell, the RRS intensity( $I$ ) at 286 nm was recorded, meanwhile, a reagent blank solution ( $I_0$ ) without  $\text{Pb}^{2+}$  was recorded, and a value of  $\Delta I = I - I_0$  was calculated.

### Absorption spectra

The absorption spectrum of nanoparticle sol also called as surface Plasmon resonance (SPR) that can be used to characterize the existence of nanoparticles. Under the selected conditions, in the absence of  $\text{Pb}^{2+}$ , there is no SPR absorption in visible region because there is no nanogold formation. In the presence of  $\text{Pb}^{2+}$ , the SPR absorption peak

at 555 nm enhanced and showed that there are gold nanoparticles in the system. A SPR method can be also developed for determination of  $2.1 \times 10^{-6}$  -  $3.36 \times 10^{-5}$  mol/L Pb, but the sensitivity is lower than the RRS method.

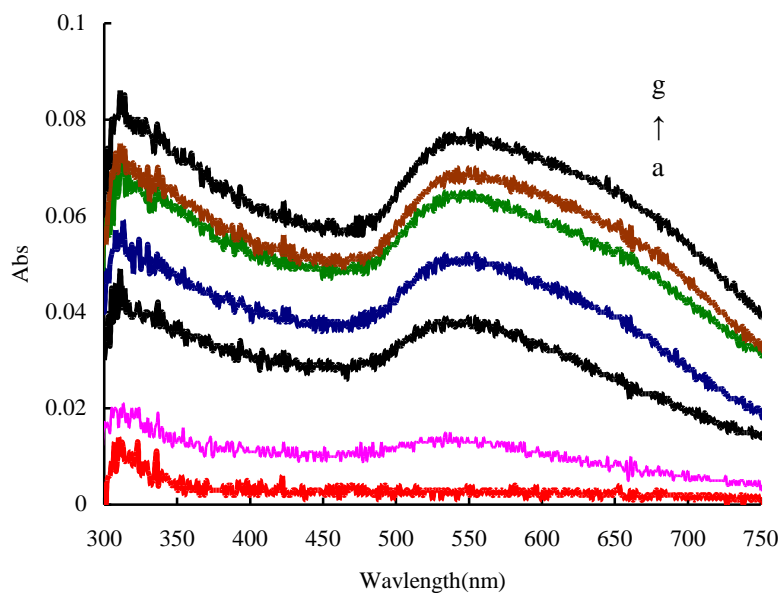

Absorption spectra

(a)  $1.3 \times 10^{-2}$  mol/L  $K_3[Fe(CN)_6]$  -  $1.3 \times 10^{-3}$  mol/L  $K_2Cr_2O_7$  -  $4.6 \times 10^{-2}$  mol/L  $H_2O_2$  - 0.16 mol/L HCl - 0.33 mol/L  $NaBH_4$  - 0.75 mol/L  $H_3PO_4$  -  $3.84 \times 10^{-4}$  mol/L  $H AuCl_4$  -  $2.4 \times 10^{-3}$  mol/L  $NH_4SCN$  - 2  $\mu g$  /mL rabic gum; (b)  $2.1 \times 10^{-6}$  mol/L  $Pb^{2+}$ ; (c)  $4.2 \times 10^{-6}$  mol/L; (d)  $8.4 \times 10^{-6}$  mol/L  $Pb^{2+}$ ; (e)  $2.1 \times 10^{-5}$  mol/L  $Pb^{2+}$ ; (f)  $2.94 \times 10^{-5}$  mol/L  $Pb^{2+}$ ; (g)  $3.36 \times 10^{-5}$  mol/L  $Pb^{2+}$

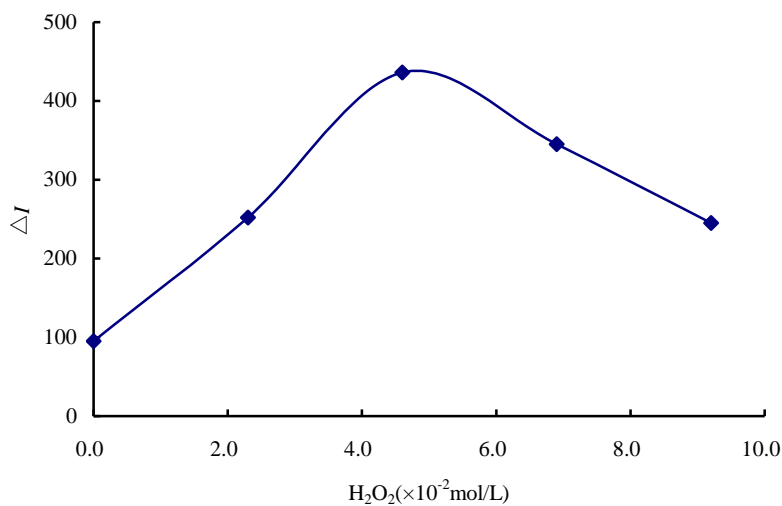

Fig. 1S Effect of the concentration of  $H_2O_2$

$1.68 \times 10^{-5}$  mol/L  $Pb^{2+}$  - 0.33 mol/L  $NaBH_4$  -  $1.3 \times 10^{-2}$  mol/L  $K_3[Fe(CN)_6]$  -  $1.3 \times 10^{-3}$  mol/L  $K_2Cr_2O_7$  - 0.16 mol/L HCl - 0.75 mol/L  $H_3PO_4$  -  $3.84 \times 10^{-4}$  mol/L  $H AuCl_4$  -  $2.4 \times 10^{-3}$  mol/L  $NH_4SCN$  - 2  $\mu g$  /mL arabic gum.

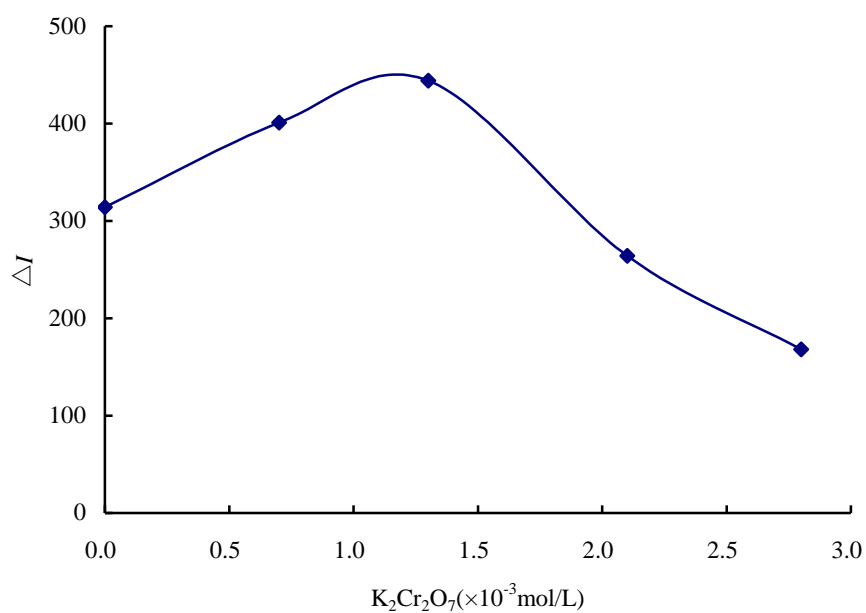

Fig. 2S Effect of the concentration of  $K_2Cr_2O_7$

$1.68 \times 10^{-5} \text{ mol/L Pb}^{2+}$ - $0.33 \text{ mol/L NaBH}_4$ - $1.3 \times 10^{-2} \text{ mol/L K}_3[\text{Fe}(\text{CN})_6]$ - $4.6 \times 10^{-2} \text{ mol/L H}_2\text{O}_2$ - $0.16 \text{ mol/L HCl}$ - $0.75 \text{ mol/L H}_3\text{PO}_4$ - $3.84 \times 10^{-4} \text{ mol/L HAuCl}_4$ - $2.4 \times 10^{-3} \text{ mol/L NH}_4\text{SCN}$ - $2 \mu\text{g/mL arabic gum}$ .

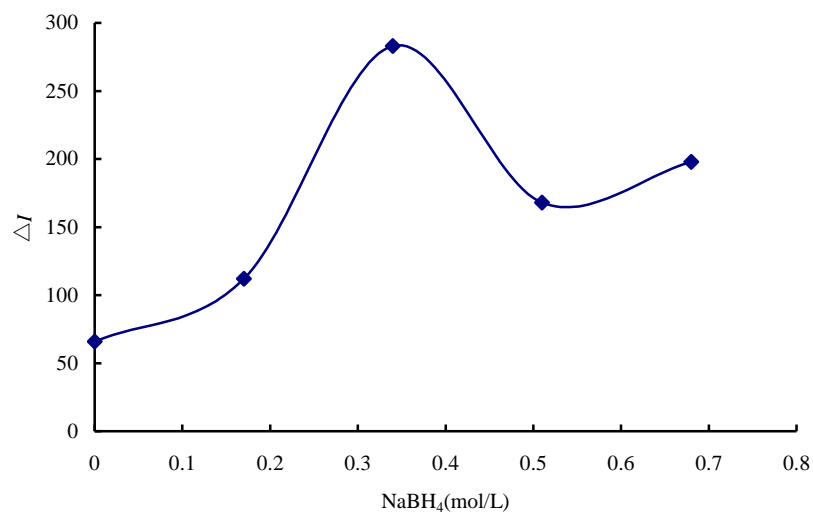

Fig. 3S Effect of the concentration of  $\text{NaBH}_4$

$1.68 \times 10^{-5} \text{ mol/L Pb}^{2+}$ - $1.3 \times 10^{-2} \text{ mol/L K}_3[\text{Fe}(\text{CN})_6]$ - $1.3 \times 10^{-3} \text{ mol/L K}_2\text{Cr}_2\text{O}_7$ - $4.6 \times 10^{-2} \text{ mol/L H}_2\text{O}_2$ - $0.16 \text{ mol/L HCl}$ - $0.75 \text{ mol/L H}_3\text{PO}_4$ - $3.84 \times 10^{-4} \text{ mol/L HAuCl}_4$ - $2.4 \times 10^{-3} \text{ mol/L NH}_4\text{SCN}$ - $2 \mu\text{g/mL arabic gum}$ .

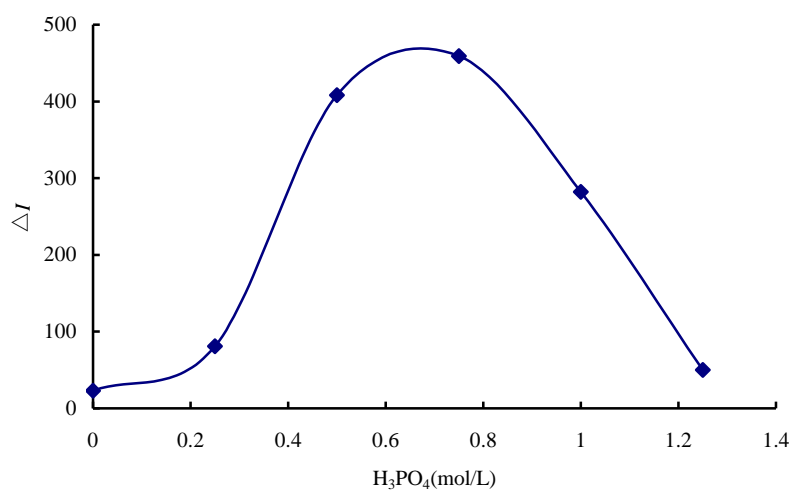

Fig. 4S Effect of the concentration of H<sub>3</sub>PO<sub>4</sub>

$1.68 \times 10^{-5}$  mol/L Pb<sup>2+</sup>-0.33 mol/L NaBH<sub>4</sub>- $1.3 \times 10^{-2}$  mol/L K<sub>3</sub>[Fe(CN)<sub>6</sub>]- $1.3 \times 10^{-3}$  mol/L K<sub>2</sub>Cr<sub>2</sub>O<sub>7</sub>- $4.6 \times 10^{-2}$  mol/L H<sub>2</sub>O<sub>2</sub>-0.16 mol/L HCl- $3.84 \times 10^{-4}$  mol/L H<sub>3</sub>PO<sub>4</sub>- $2.4 \times 10^{-3}$  mol/L NH<sub>4</sub>SCN-2 μg/mL arabic gum.

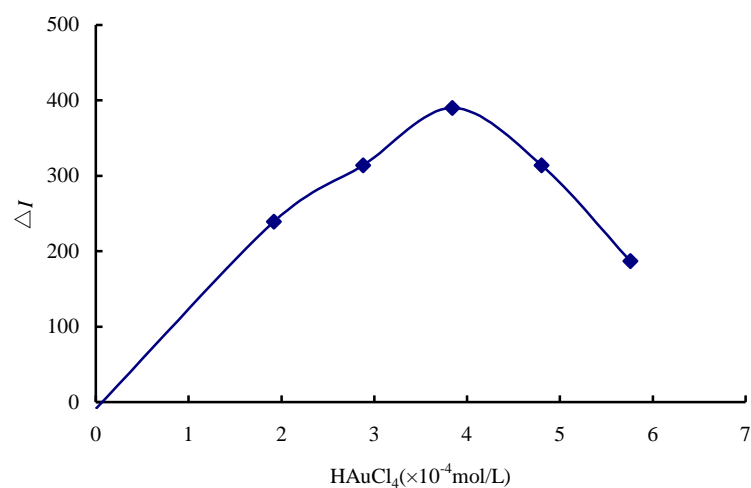

Fig. 5S Effect of the concentration of H<sub>3</sub>AuCl<sub>4</sub>

$1.68 \times 10^{-5}$  mol/L Pb<sup>2+</sup>-0.33 mol/L NaBH<sub>4</sub>- $1.3 \times 10^{-2}$  mol/L K<sub>3</sub>[Fe(CN)<sub>6</sub>]- $1.3 \times 10^{-3}$  mol/L K<sub>2</sub>Cr<sub>2</sub>O<sub>7</sub>- $4.6 \times 10^{-2}$  mol/L H<sub>2</sub>O<sub>2</sub>-0.16 mol/L HCl-0.75 mol/L H<sub>3</sub>PO<sub>4</sub>- $2.4 \times 10^{-3}$  mol/L NH<sub>4</sub>SCN-2 μg/mL arabic gum.
